# Supplementary material for: Synthesis of fluorinated SnO23D hierarchical structures assembled from nanosheets and their enhanced photocatalytic activity
Source: Royal Society of Chemistry journal article supplement (doi:10.1039/c5ra15179a), 2015-01-01
Supplement: c5ra15179a1.pdf [file c5ra15179a1.pdf]

**Supplementary Information for:**

**Synthesis of Fluorinated SnO<sub>2</sub> 3D Hierarchical Structure Assembled from Nanosheets and**

**Its Enhanced Photocatalytic Activity**

*Youzhi Wang, Guoe Cheng\*, Yu Zhang, Hanzhong Ke and Chunling Zhu*

*Faculty of Material & Chemistry*

*China University of Geosciences*

*Wuhan, 430074, P.R. China*

*\*E-mail: [chengguoe68@aliyun.com](mailto:chengguoe68@aliyun.com), [chengge@cug.edu.cn](mailto:chengge@cug.edu.cn)*

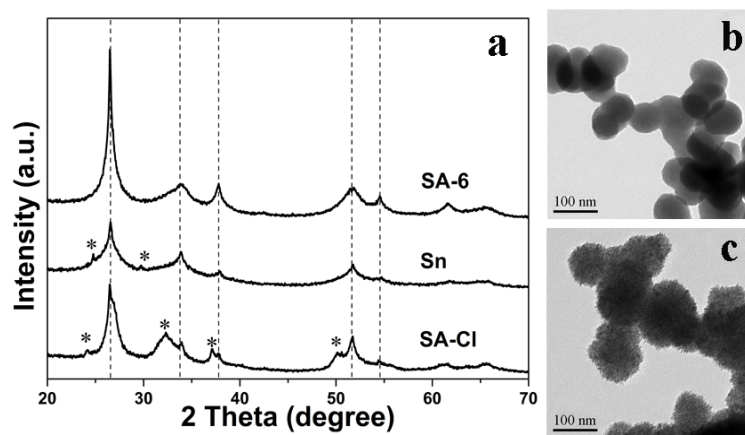

Fig. 1S (a) XRD patterns of Sn and SA-Cl; (b, c) TEM images of Sn and SA-Cl.

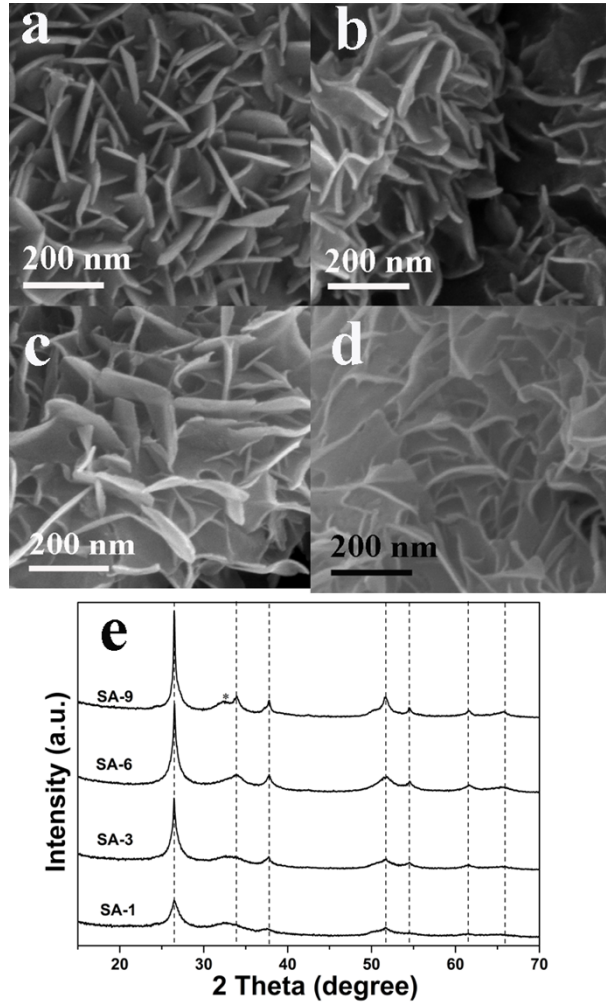

Fig. 2S (a-d) SEM images of SA-1, SA-3, SA-6 and SA-9 respectively; (e) XRD patterns of these samples.

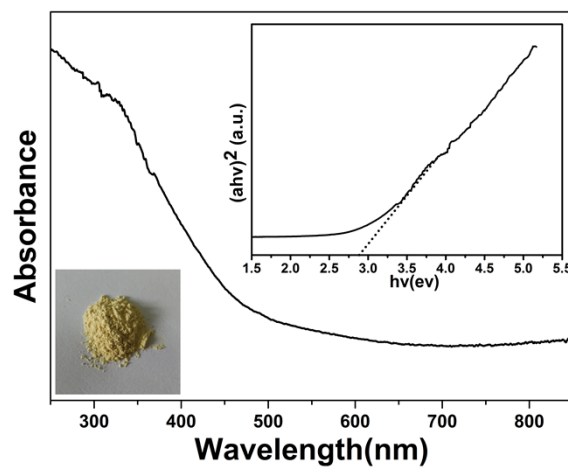

Fig. 3S UV-visible diffuse reflectance spectrum of SA-6, curve in the inset is the corresponding  $(Ah\nu)^2$  versus Photon energy ( $h\nu$ ) for the evaluation of the bandgap energy, a is denoted as the absorbance.
